# Supplementary material for: Catalyst-free synthesis of 2,3-dihydro-1,5-benzothiazepines in a renewable and biodegradable reaction medium
Source: Royal Society of Chemistry journal article supplement (doi:10.1039/c8nj05611k), 2019-01-01
Supplement: c8nj05611k1.pdf [file c8nj05611k1.pdf]

## **Catalyst-Free Synthesis of 2,3-dihydro-1,5-benzothiazepines in Renewable and Biodegradable Reaction Medium**

Neetu Yadav<sup>#</sup>, Vijay B. Yadav<sup>#</sup>, Mohd Danish Ansari, Hozeyfa Sagir,

Ankit Verma and I. R. Siddiqui\*

*Laboratory of Green Synthesis, Department of Chemistry, University of Allahabad,*

*Allahabad, 211002, India*

*E-mail: [dr.irsiddiqui@gmail.com](mailto:dr.irsiddiqui@gmail.com) ; Tel.: +91-9335153359*

*# These authors contributed equally*

| <b>Contents</b>                                                        | <b>Page No.</b> |
|------------------------------------------------------------------------|-----------------|
| List of contents                                                       | 1               |
| General Information and Experimental Procedures                        | 2               |
| <sup>1</sup> H NMR, <sup>13</sup> C NMR and Mass spectral data of 3a-n | 3-10            |

## **Experimental Section**

### **General procedure for the synthesis of 2,3-dihydro-1,5- benzothiazepine .**

10 mL Glycerol was added to a round bottom and then respective Chalcone (1mmol) and 2-aminothiophenol(1mmol) as reactant were added under stirring at 70°C catalyst free condition. It was allowed to stir till completion of the reaction. Progress of the reaction was monitored by TLC the product was precipitated by addition of 10 mL of H<sub>2</sub>O. After that products were separated by simple filtration.

### 2-Phenyl-4-(4-bromophenyl)-2,3-dihydro-1,5-benzothiazepine (3a)

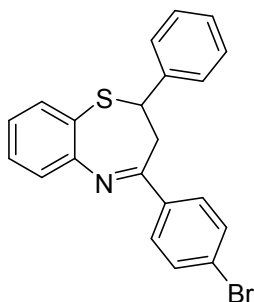

mp 135 °C.  $^1\text{H}$  NMR ( $\text{CDCl}_3$ , 400 MHz): = 3.07 (t,  $J = 12.7$  Hz, 1 H), 3.25 (dd,  $J = 4.9, 13.0$  Hz, 1 H), 4.94 (dd,  $J = 4.8, 12.4$  Hz, 1 H), 7.12 (td,  $J = 1.5, 7.5$  Hz 1 H), 7.26-7.33 (m, 6 H), 7.49 (td,  $J = 1.5, 7.6$  Hz 1 H), 7.64 (d,  $J = 8.6$  Hz, 3 H), 7.95 (d,  $J = 8.6$  Hz, 2 H).  $^{13}\text{C}$  NMR ( $\text{CDCl}_3$ , 100 MHz): 37.72 (C), 60.52 (CH<sub>2</sub>), 123.64 (C), 125.32 (CH), 126.27 (CH), 128.07 (CH), 128.79 (CH), 129.33 (CH), 129.78 (CH), 133.11 (CH), 135.29 (CH), 141.61 (C), 153.19 (C), 166.92 (C).

### 4-(4-acetoxyphenyl)-2-phenyl-2,3-dihydro-1,5-benzothiazepine (3b)

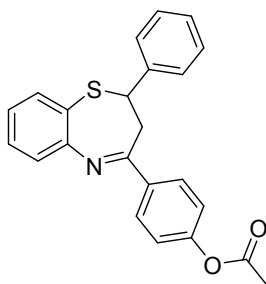

142-143 °C.  $^1\text{H}$  NMR ( $\text{CDCl}_3$ , 400 MHz): = 2.34 (s, 3 H), 3.03 (t,  $J = 12.8$  Hz, 1 H), 3.26 (dd,  $J = 4.8, 13.0$  Hz, 1 H), 4.96 (dd,  $J = 4.8, 13.0$  Hz, 1 H), 7.16 (td,  $J = 1.4, 7.5$  Hz, 1 H), 7.25-7.33 (m, 8 H), 7.46-7.54 (m, 1 H), 7.65 (dd,  $J = 1.4, 7.7$  Hz, 1 H), 8.12 (d,  $J = 8.8$  Hz, 2

H).  $^{13}\text{C}$  NMR ( $\text{CDCl}_3$ , 100 MHz): 21.213 ( $\text{CH}_3$ ), 36.4 ( $\text{CH}_2$ ), 60.4 ( $\text{CH}$ ), 122.9 ( $\text{CH}$ ), 125.4 ( $\text{CH}$ ), 126.6 ( $\text{CH}$ ), 127.7 ( $\text{CH}$ ), 128.6 ( $\text{CH}$ ), 129.8 ( $\text{CH}$ ), 136.1 ( $\text{CH}$ ), 146.0 ( $\text{C}$ ), 152.3 ( $\text{C}$ ), 154.0 ( $\text{C}$ ), 166.0 ( $\text{C}$ ), 169.2 ( $\text{C}$ ). IR (KBr): 1598, 1755, 2917  $\text{cm}^{-1}$ . MS (ESI):  $m/z = 374.43$  ( $\text{MH}^+$ ). Anal. Calcd. for  $\text{C}_{23}\text{H}_{19}\text{NO}_2\text{S}$ : C, 73.97; H, 5.13; N, 3.75, found: C, 74.07; H, 5.16; N, 3.74.

### 2-(3-Methylthiophen-2-yl)-4-phenyl-2,3-dihydro-1,5-benzothiazepine (3c)

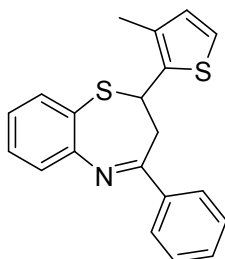

mp 121-124  $^{\circ}\text{C}$ .  $^1\text{H}$  NMR ( $\text{CDCl}_3$ , 400 MHz):  $\delta$  2.24 (s, 3 H), 2.97 (t,  $J = 12.8$  Hz, 1 H), 3.35 (dd,  $J = 4.9, 12.9$  Hz, 1 H), 5.34 (dd,  $J = 4.8, 12.5$  Hz, 1 H), 6.83 (d,  $J = 5.1$  Hz, 1 H), 7.05 (d,  $J = 5.0$  Hz, 1 H), 7.15 (t,  $J = 7.5$  Hz, 1 H), 7.33 (d,  $J = 8.9$  Hz, 1 H), 7.45-7.63 (m, 5 H), 8.08 (d,  $J = 7.9$  Hz, 2 H).  $^{13}\text{C}$  NMR ( $\text{CDCl}_3$ , 100 MHz): 16.04 ( $\text{CH}_3$ ), 38.38 ( $\text{CH}_2$ ), 53.58 ( $\text{CH}$ ), 121.91 ( $\text{CH}$ ), 125.53 ( $\text{CH}$ ), 126.59 ( $\text{CH}$ ), 128.54 ( $\text{CH}$ ), 128.85 ( $\text{CH}$ ), 129.32 ( $\text{CH}$ ), 129.87 ( $\text{CH}$ ), 130.36 ( $\text{CH}$ ), 132.52 ( $\text{CH}$ ), 135.87 ( $\text{CH}$ ). MS (ESI):  $m/z = 336.36$  ( $\text{MH}^+$ ). IR (KBr): 1608, 2918  $\text{cm}^{-1}$ . Anal. Calcd for  $\text{C}_{20}\text{H}_{17}\text{NS}_2$ : C, 71.60; H, 5.11; N, 4.18, found: C, 71.63; H, 5.12; N, 4.17.

### 2-Phenyl-4-(Thiophen-2-yl)-2,3-dihydro-1,5-benzothiazepine (3d)

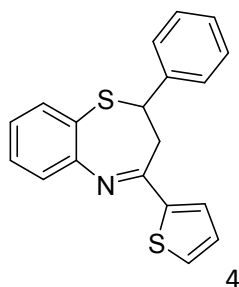

mp 122 - 125 °C. <sup>1</sup>H NMR (CDCl<sub>3</sub>, 400 MHz): = 3.04 (t, *J* = 12.6 Hz, 1 H), 3.24 (dd, *J* = 4.7, 12.8 Hz, 1 H), 5.01 (dd, *J* = 4.7, 12.0 Hz, 1 H), 7.06-7.16 (m, 2 H), 7.17- 7.33 (m, 6 H), 7.35-7.44 (m, 1 H), 7.52-7.59 (m, 3 H). <sup>13</sup>C NMR (CDCl<sub>3</sub>, 100 MHz): 38.7 (CH<sub>2</sub>), 60.1 (CH), 123.6 (C), 125.4 (CH), 127.1 (CH), 128.0 (CH), 128.6 (CH), 129.7 (CH), 133.1 (CH), 135.5 (CH), 143.4 (C), 164.5 (C). IR (KBr): 1605, 2920 cm<sup>-1</sup>. Anal. Calcd for C<sub>19</sub>H<sub>15</sub>NS<sub>2</sub>: C, 70.99; H, 4.70; N, 4.36, found: C, 71.13; H, 4.72; N, 4.35.

#### 4-(4-Nitrophenyl)-2-phenyl-2,3-dihydro-1,5-benzothiazepine (3e)

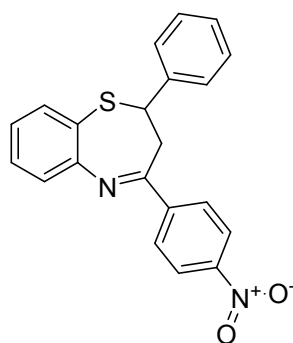

mp 122 - 124 °C. <sup>1</sup>H NMR (CDCl<sub>3</sub>, 400MHz): = 3.12 (t, *J* = 13.1 Hz, 1 H), 3.27 (dd, *J* = 5.0, 13.2 Hz, 1 H), 5.02 (dd, *J* = 5.0, 12.0 Hz, 1 H), 7.17 (dt, *J* = 1.5, 7.5 Hz, 1 H), 7.23-7.36 (m, 6

H), 7.52 (dt,  $J = 1.5, 7.6$  Hz, 1 H), 7.65 (dd,  $J = 1.5, 7.7$  Hz, 1 H), 8.17-8.26 (m, 2 H), 8.32-8.35 (m 2 H).

**2-(4-Nitrophenyl)-4-phenyl-2,3-dihydro-1,5-benzothiazepine (3f)**

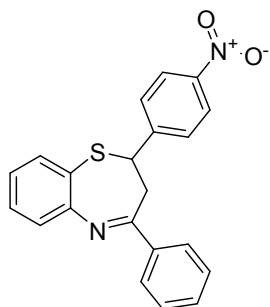

mp 184-186°C  $^1\text{H NMR}$  ( $\text{CDCl}_3$ , 400 MHz): = 3.07 (t,  $J = 12.7$  Hz, 1 H), 3.41 (dd,  $J = 4.9, 12.8$  Hz, 1 H), 5.06 (dd,  $J = 4.8, 12.5$  Hz, 1 H), 7.21-7.24 (m, 1 H), 7.46-7.64 (m, 8 H), 8.16 (d,  $J = 8.7$  Hz, 2 H).

**2-(4-Methoxyphenyl)-4-phenyl-2,3-dihydro-1,5-benzothiazepine (3g)**

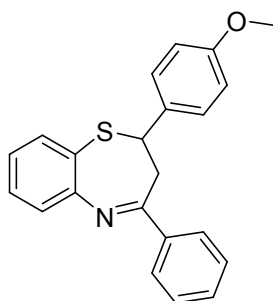

mp 126-127 °C  $^1\text{H NMR}$  ( $\text{CDCl}_3$ , 400MHz): = 3.07 (t,  $J = 12.7$  Hz, 1 H), 3.32 (dd,  $J = 4.7, 12.9$  Hz, 1 H), 3.83 (s, 3 H), 4.96 (dd,  $J = 4.7, 12.5$  Hz, 1 H), 6.85 (d,  $J = 11.15$  Hz, 2 H),

7.17 (t,  $J = 7.5$  Hz, 1 H), 7.25 (d,  $J = 8.6$  Hz, 2 H), 7.34 (d,  $J = 7.9$  Hz, 1 H), 7.48 – 7.55 (m, 4 H), 7.62 (d,  $J = 7.6$  Hz, 1H), 8.08 (d,  $J = 7.15$  Hz, 2 H).

**2-(4-Hydroxyphenyl)-4-phenyl-2,3-dihydro-1,5-benzothiazepine (3h)**

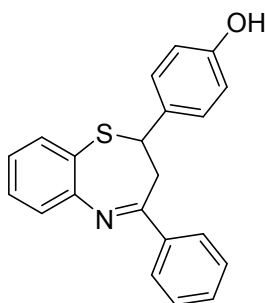

mp 132-134 °C.  $^1\text{H}$  NMR ( $\text{CDCl}_3$ , 400 MHz): = 3.03 (t,  $J = 12.7$  Hz, 1 H), 3.26 (dd,  $J = 4.8$ , 12.9 Hz, 1 H), 4.93 (dd,  $J = 4.7$ , 12.5 Hz, 1 H), 5.12 (bs, 1 H), 6.78 (d,  $J = 8.5$  Hz, 2 H), 7.16-7.23 (m, 3 H), 7.37 (d,  $J = 8.5$  Hz, 1 H), 7.44- 7.53 (m, 4 H), 7.65 (dd,  $J = 1.5$ , 7.7 Hz, 1 H), 8.08 (m, 2 H).  $^{13}\text{C}$  NMR ( $\text{CDCl}_3$ , 100 MHz): 36.97 ( $\text{CH}_2$ ), 60.12 (CH), 115.58 (CH), 122.09 (C), 127.45 (CH), 127.73 (CH), 131.15 (CH), 136.54 (C), 141.56 (C), 153.24 (C). IR (KBr): 1595, 2923, 3351  $\text{cm}^{-1}$ . MS (ESI):  $m/z = 332.24$  ( $\text{MH}^+$ ). Anal. Calcd. for  $\text{C}_{21}\text{H}_{17}\text{NOS}$ : C, 76.10; H, 5.17; N, 4.23, found: C, 76.23; H, 5.13; N, 4.21.

**2-(4-acetoxyphenyl)-4-phenyl-2,3-dihydro-1,5-benzothiazepine (3i)**

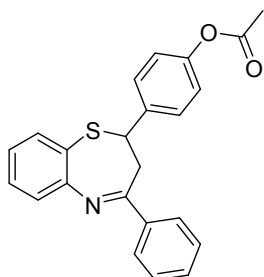

$^1\text{H}$  NMR ( $\text{CDCl}_3$ , 400 MHz): = 2.34 (s, 3 H), 3.04 (t,  $J$  = 12.8 Hz, 1 H), 3.30 (dd,  $J$  = 4.7, 12.9 Hz, 1 H), 4.96 (dd,  $J$  = 4.7, 12.6 Hz, 1 H), 7.02 (d,  $J$  = 8.4 Hz, 2 H), 7.14 (t,  $J$  = 7.3 Hz, 1 H), 7.31-7.37 (m, 3 H), 7.46-7.68 (m, 5 H), 8.05 (d,  $J$  = 8.19 Hz, 2 H).  $^{13}\text{C}$  NMR ( $\text{CDCl}_3$ , 100 MHz): 23.17 ( $\text{CH}_3$ ), 37.75 ( $\text{CH}_2$ ), 57.76 (CH), 121.83 (CH), 123.79 (C), 125.52 (CH), 127.24 (CH), 127.54 (CH), 128.83 (CH), 129.92 (CH), 132.40 (CH), 134.87 (CH), 136.86 (C), 143.59 (C), 150.08 (C), 151.91 (C), 169.23 (C), 170.47 (C). IR (KBr): 1600, 1745, 2916  $\text{cm}^{-1}$ . MS (ESI):  $m/z$  = 373.7. Anal. Calcd. for  $\text{C}_{23}\text{H}_{19}\text{NO}_2\text{S}$ : C, 73.97; H, 5.13; N, 3.75, found: C, 74.13; H, 5.12; N, 3.72.

### 2-(4-Chlorophenyl)-4-phenyl-2,3-dihydro-1,5-benzothiazepine (3j)

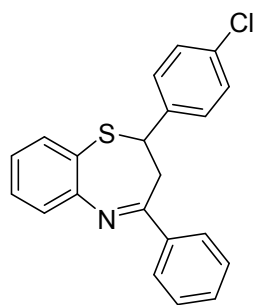

mp 126-128 °C  $^1\text{H}$  NMR ( $\text{CDCl}_3$ , 400 MHz): = 3.05 (t,  $J$  = 12.8 Hz, 1 H), 3.32 (dd,  $J$  = 4.8, 12.8 Hz, 1 H), 4.98 (dd,  $J$  = 4.8, 12.8 Hz, 1 H), 7.17 (t,  $J$  = 7.4 Hz, 1 H), 7.25-7.33 (m, 5 H), 7.45-7.56 (m, 3 H), 7.62 (d,  $J$  = 7.6 Hz, 2 H), 8.58 (d,  $J$  = 7.6 Hz, 2 H). Isolated Yield: 319 mg, 73.0%.

### 2,4-Diphenyl-2,3-dihydro-1,5-benzothiazepine (3k)

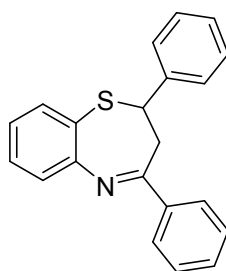



mp 115-117 °C <sup>1</sup>H NMR (400 MHz, CDCl<sub>3</sub>): 3.05 (t, *J* = 12.6 Hz, 1 H), 3.34 (dd, *J* = 4.7, 13.1 Hz, 1 H), 4.98 (dd, *J* = 4.5, 12.0 Hz, 1 H), 7.10-7.18 (m, 1H), 7.27-7.32 (m, 5 H), 7.42-7.53 (m, 4 H), 7.60 (d, *J* = 6.1 Hz, 2 H), 8.06 (d, *J* = 7.5 Hz, 2 H).

**2-(4-Methoxyphenyl)-4-(4-methoxyphenyl)-2,3-dihydro-1,5-benzothiazepine (3l)**

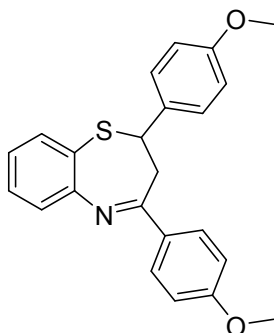

Yellow solid; mp 105- 106 °C <sup>1</sup>H NMR (CDCl<sub>3</sub>, 400 MHz): = 3.03 (t, *J* = 12.8 Hz, 1 H), 3.22 (dd, *J* = 4.5, 13.0 Hz, 1 H), 3.77 (s, 3 H), 4.03 (s, 3 H), 4.96 (dd, *J* = 4.3, 12.1 Hz, 1 H), 6.80 (d, *J* = 8.3 Hz, 2 H), 6.97 (d, *J* = 8.4 Hz, 2 H), 7.10 (t, *J* = 7.5 Hz, 1 H), 7.18-7.27 (m, 3 H), 7.45 (t, *J* = 7.5 Hz, 1 H), 7.56 (d, *J* = 8.4 Hz, 1 H), 8.01 (d, *J* = 7.6 Hz, 2 H).

**2-(4-Bromophenyl)-4-phenyl-2,3-dihydro-1,5-benzothiazepine (3m)**

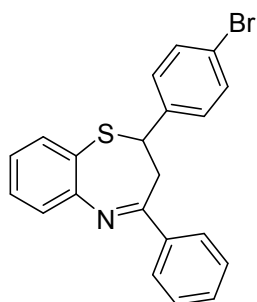

Pale yellow solid; mp 117-120 °C  $^1\text{H}$  NMR ( $\text{CDCl}_3$ , 400 MHz): = 3.00 (t,  $J = 12.8\text{Hz}$ , 1 H), 3.26 (dd,  $J = 4.8, 12.9\text{ Hz}$ , 1 H), 4.95 (dd,  $J = 4.8, 12.5\text{ Hz}$ , 1 H), 7.16-7.21 (m, 3 H), 7.30 (dd,  $J = 1.2, 7.9\text{ Hz}$ , 1 H), 7.46-7.58 (m, 6 H), 7.62 (dd,  $J = 1.3, 7.7\text{ Hz}$ , 1 H), 8.03 (d,  $J = 8.0\text{ Hz}$ , 2 H).
